# Supplementary material for: Contextual Sentiment Neural Network for Document Sentiment Analysis
Source: Springer Nature journal article supplement (doi:10.1007/s41019-020-00122-4), 2020-05-20
Supplement: 41019_2020_122_MOESM1_ESM.pdf [file 41019_2020_122_MOESM1_ESM.pdf]

APPENDIX

This section briefly explains the sentiment propagation mechanism in the IP learning for the CSNN.

A. Effect of IP learning for WOSL, SSL, WLCSL

**Notation.** Let us define  $R(\cdot)$  and  $PN(\cdot)$  as

$$R(w_t^{\mathbf{Q}}) := \begin{cases} -1 & (\text{sentiment of } w_t^{\mathbf{Q}} \text{ is shifted}) \\ 1 & (\text{otherwise}) \end{cases}, \quad (8)$$

$$PN(w_t^{\mathbf{Q}}, \mathbf{Q}) := \begin{cases} 1 & (\text{sign}(d^{\mathbf{Q}} - 0.5) \neq (R(w_t^{\mathbf{Q}}))) \\ -1 & (d^{\mathbf{Q}} = (\text{sign}(d^{\mathbf{Q}} - 0.5) = (R(w_t^{\mathbf{Q}}))) \end{cases} \quad (9)$$

where  $PN(w_t^{\mathbf{Q}}, \mathbf{Q}) = 1$  denotes the case where the sentiment of term  $w_t^{\mathbf{Q}}$  is shifted in a negative review  $\mathbf{Q}$  or the sentiment of term  $w_t^{\mathbf{Q}}$  is not shifted in a positive review, and  $PN(w_t^{\mathbf{Q}}, \mathbf{Q}) = -1$  denotes the opposite case.

Moreover, we define Condition A.1 as

*Condition A.1:* if word  $w_i$  in  $S^d$  then,

$$w_i^p \begin{cases} > 0 & (OS(w_i^p) > 0) \\ < 0 & (OS(w_i^p) < 0) \end{cases} \quad (10)$$

is satisfied, where

$$OS(w_j^p) := E[PN(w_t^{\mathbf{Q}}, \mathbf{Q}) | w_t^{\mathbf{Q}} = w_j^p, \mathbf{Q} \in \Omega^{tr}].$$

and  $\Omega^{tr}$  is a set of reviews in a training dataset.

Here, the following Proposition A.2 is satisfied:

*Proposition A.2:* If Condition A.1 is satisfied, and  $\min_{w_i \in S^d} \|w_i^{em} - w_j^{em}\|_2 < \delta$  where  $\delta (> 0)$  is sufficiently small, then, the following equations are satisfied for word  $w_j$  after sufficient iterations through IP learning:

$$E[w_j^p] \begin{cases} > 0 & (OS(w_j^p) > 0) \\ < 0 & (OS(w_j^p) < 0) \end{cases}, \quad (11)$$

$$E[s_t^{\mathbf{Q}}] \begin{cases} > 0 & (R(w_t^{\mathbf{Q}}) > 0) \\ < 0 & (R(w_t^{\mathbf{Q}}) < 0) \end{cases} \quad (12)$$

Proposition A.2 denotes that if the meaning of a term  $w_j$  is sufficiently similar to any of words in  $S^d$  and  $S^d$  satisfies Condition A.1, then, its word-level original sentiments and sentiment shifts are expected to be accurately assigned by the CSNN. The quality of the word sentiment dictionary is important for the success of propagation, where  $|S^d|$  should not be too small and each word in  $S^d$  must satisfy Condition A.1. This proposition can be explained using the following propositions A.3–A.6.

*Proposition A.3:* For every  $c_t^{\mathbf{Q}} \in \{\{c_t^{\mathbf{Q}}\}_{t=1}^n | \mathbf{Q} \in \Omega^{tr}\}$ ,

$$\frac{\partial L^{\mathbf{Q}}}{\partial c_t^{\mathbf{Q}}} \begin{cases} < 0 & (d^{\mathbf{Q}} = 1) \\ > 0 & (d^{\mathbf{Q}} = 0) \end{cases} \quad (13)$$

where

$$c_t^{\mathbf{Q}} := p_t^{\mathbf{Q}} \cdot s_t^{\mathbf{Q}}.$$

*Proposition A.4:* If  $d^{\mathbf{Q}} = 1$  and  $w_i^p > 0$ , or  $d^{\mathbf{Q}} = 0$  and  $w_i^p < 0$  word  $w_i = w_t^{\mathbf{Q}}$ , then,  $\frac{\partial L^{\mathbf{Q}}}{\partial s_t^{\mathbf{Q}}} < 0$ . In the opposite case,  $\frac{\partial L^{\mathbf{Q}}}{\partial s_t^{\mathbf{Q}}} > 0$ .

*Proposition A.5:* Let  $D_i^{\mathbf{Q}}$  be a set of passages that include word  $w_i$ , and  $t'(\mathbf{Q}, i)$  be  $\{t' | w_{t'}^{\mathbf{Q}} = w_i, w_{t'}^{\mathbf{Q}} \in \mathbf{Q}\}$ . If

$$\|w_i^{em} - w_j^{em}\|_2 < \delta, \quad (14)$$

$$\min_{t' \in t'(\mathbf{Q}, i), \mathbf{Q} \in D_i^{\mathbf{Q}}} \|\vec{h}_t^{\mathbf{Q}} - \vec{h}_{t'}^{\mathbf{Q}}\|_2 < T' \delta, \quad (15)$$

and

$$\min_{t' \in t'(\mathbf{Q}, i), \mathbf{Q} \in D_i^{\mathbf{Q}}} \|\overleftarrow{h}_t^{\mathbf{Q}} - \overleftarrow{h}_{t'}^{\mathbf{Q}}\|_2 < T'' \delta, \quad (16)$$

where  $\delta > 0$  is established, then,

$$\min_{t' \in t'(\mathbf{Q}, i), \mathbf{Q} \in D_i^{\mathbf{Q}}} \|s_t^{\mathbf{Q}} - s_{t'}^{\mathbf{Q}}\|_2 < T''' \delta \quad (17)$$

where  $T' > 0, T'' > 0, T''' > 0$ , and  $w_j = w_t^{\mathbf{Q}}$ .

*Proposition A.6:* If  $w_j$  satisfies

$$\begin{cases} s_t^{\mathbf{Q}} < 0 & (R(w_t^{\mathbf{Q}}) = -1, w_t = w_j) \\ s_t^{\mathbf{Q}} > 0 & (R(w_t^{\mathbf{Q}}) = 1, w_t = w_j) \end{cases} \quad (18)$$

, then,  $w_j$  satisfies

$$\begin{cases} \frac{\partial L^{\mathbf{Q}}}{\partial w_j^p} < 0 & (PN(w_t^{\mathbf{Q}}, \mathbf{Q}) = 1 \wedge w_t^{\mathbf{Q}} = w_j) \\ \frac{\partial L^{\mathbf{Q}}}{\partial w_j^p} > 0 & (PN(w_t^{\mathbf{Q}}, \mathbf{Q}) = -1 \wedge w_t^{\mathbf{Q}} = w_j) \end{cases}. \quad (19)$$

*Proposition A.7:* Let the values of  $W^O$  before and after performing *Update* in Algorithm 1 in the  $t$ th iteration be  $W_t^{O,a}$  and  $W_t^{O,b}$ , respectively. Then,

$$\frac{\|W_t^{O,a} - W_t^{O,b}\|_2}{\|W_t^{O,b}\|_2} \xrightarrow{t \rightarrow \infty} 0. \quad (20)$$

B. Effect of IP learning for GIL

In IP learning, the values of GIL are assigned in the form that terms with strong sentiment are attentioned:

$$\frac{\partial L^{\mathbf{Q}}}{\partial \alpha_t^{\mathbf{Q}}} = M_t^{\mathbf{Q}T} \Delta_o^{\mathbf{Q}} \cdot s_t^{\mathbf{Q}} \cdot p_t^{\mathbf{Q}} \quad (21)$$

where

$$M_t^{\mathbf{Q}} := W^O b_t^{\mathbf{Q}} \text{diag}(1 - (\tanh(\sum_{t=1}^n v_t^{\mathbf{Q}}))^2), \quad (22)$$

$$\Delta_o^{\mathbf{Q}} := \begin{cases} (\alpha^{\mathbf{Q}} - (1, 0)) & (d^{\mathbf{Q}} = 0) \\ (\alpha^{\mathbf{Q}} - (0, 1)) & (d^{\mathbf{Q}} = 1) \end{cases}, \quad (23)$$

$$M_t^{\mathbf{Q}T} \Delta_o^{\mathbf{Q}} \begin{cases} > 0 & (d^{\mathbf{Q}} = 0) \\ < 0 & (d^{\mathbf{Q}} = 1) \end{cases}. \quad (24)$$

This attention manner is known to be natural for humans [6].

*Proposition A.8:* When Init is used, then, if  $\min_{w_j \in S^d} |e_t^{\mathbf{Q}} - w_j^{em}| < \epsilon$  where  $\epsilon > 0$  is sufficiently small, then,

$$\text{sign} \left( \frac{\partial L^{\mathbf{Q}'}}{\partial p_{t'}^{\mathbf{Q}'}} \right) = \begin{cases} R(w_{t'}^{\mathbf{Q}'}(w_{t'}^{\mathbf{Q}'}, w_j)) & (d^{\mathbf{Q}} = 0) \\ -R(w_{t'}^{\mathbf{Q}'}(w_{t'}^{\mathbf{Q}'}, w_j)) & (d^{\mathbf{Q}} = 1) \end{cases}.$$

where

$$I(a, b) := \begin{cases} 1 & (a = b) \\ 0 & (a \neq b) \end{cases}, \Psi(a, b) := \begin{cases} 1 & (a = b) \\ -1 & (a \neq b) \end{cases}$$

is established.

Proposition A.8 explains the effect of Init for the word-level original sentiment assignment property of CSNN.

### C. Proofs of Propositions A.3–A.7

We introduce the proofs of Propositions A.3–A.7

#### 1) Proof of Proposition A.3:

$$\begin{aligned} & \frac{\partial L^{\mathbf{Q}}}{\partial c_t^{\mathbf{Q}}} \\ = & \frac{\partial L^{\mathbf{Q}}}{\partial \mathbf{a}^{\mathbf{Q}}} \frac{\partial \mathbf{a}^{\mathbf{Q}}}{\partial (\tanh(\sum_{t=1}^n \mathbf{v}_t^{\mathbf{Q}}))} \frac{\partial (\tanh(\sum_{t=1}^n \mathbf{v}_t^{\mathbf{Q}}))}{\partial \sum_{t=1}^n \mathbf{v}_t^{\mathbf{Q}}} \frac{\partial \sum_{t=1}^n \mathbf{v}_t^{\mathbf{Q}}}{\partial g_t^{\mathbf{Q}}} \\ = & \Delta_o^{\mathbf{Q}} \mathbf{W}^o \mathbf{b}_t^{\mathbf{Q}} \text{diag}(1 - (\tanh(\sum_{t=1}^n \mathbf{v}_t^{\mathbf{Q}}))^2) \alpha_t^{\mathbf{Q}} \\ = & \mathbf{M}_t^{\mathbf{Q}T} \Delta_o^{\mathbf{Q}} \alpha_t^{\mathbf{Q}} \end{aligned}$$

where

$$\begin{aligned} \mathbf{M}_t^{\mathbf{Q}} &= \mathbf{W}^o \text{diag}(1 - (\tanh(\sum_{t=1}^n \mathbf{v}_t^{\mathbf{Q}}))^2) \mathbf{b}_t^{\mathbf{Q}} \\ \Delta_o^{\mathbf{Q}} &= \begin{cases} \mathbf{a}^{\mathbf{Q}} - (1, 0)^T & (d^{\mathbf{Q}} = 0) \\ \mathbf{a}^{\mathbf{Q}} - (0, 1)^T & (d^{\mathbf{Q}} = 1) \end{cases} \end{aligned}$$

Here,  $\frac{\partial L}{\partial c^{\mathbf{Q}}}$  is positive and negative when  $d^{\mathbf{Q}} = 0$  and  $d^{\mathbf{Q}} = 1$ , respectively, ( $t = 1, 2, \dots, n$ , ) because  $m_t^{\mathbf{Q}}, 0 \leq 0$  and  $m_t^{\mathbf{Q}}, 1 \geq 0$  by *Update*. Therefore, the proposition is established.

#### 2) Proof of Proposition A.4:

$$\begin{aligned} \frac{\partial L^{\mathbf{Q}}}{\partial s_t^{\mathbf{Q}}} &= \frac{\partial L^{\mathbf{Q}}}{\partial c_t^{\mathbf{Q}}} \frac{\partial c_t^{\mathbf{Q}}}{\partial s_t^{\mathbf{Q}}} = \mathbf{M}_t^{\mathbf{Q}T} \Delta_o^{\mathbf{Q}} \alpha_t^{\mathbf{Q}} p_t^{\mathbf{Q}} \\ \frac{\partial L^{\mathbf{Q}}}{\partial s_t^{\mathbf{Q}}} &= \frac{\partial L^{\mathbf{Q}}}{\partial c_t^{\mathbf{Q}}} \frac{\partial c_t^{\mathbf{Q}}}{\partial s_t^{\mathbf{Q}}} = \frac{\partial L^{\mathbf{Q}}}{\partial c_t^{\mathbf{Q}}} p_t^{\mathbf{Q}} \end{aligned} \quad (25)$$

where word  $w_i = w_t^{\mathbf{Q}}$ , and the  $p_{t,i}$  is the  $i$ th element of  $p_t$ . Therefore, from Proposition A.3 and the above Eq (25), this proposition is established.

3) Proof of Proposition A.5: Proposition A.5 can be explained as follows. Here, Eq (15) can be explained from the property of the skip-gram method: if  $\|w_i^{\text{em}} - w_j^{\text{em}}\| < \delta$  and the value of  $\delta$  is sufficiently small, then, the appearance patterns of the word  $w_i$  and  $w_j$  are similar.

*Proof.*

For every  $t' \in t'(\mathbf{Q}, i)$ ,  $\mathbf{Q} \in D_i^{\mathbf{Q}}$ ,

$$\begin{aligned} \|s_t^{\mathbf{Q}} - s_{t'}^{\mathbf{Q}'}\| &= \|\tanh(\mathbf{v}^{leftT} \overleftarrow{\mathbf{h}}_t^{\mathbf{Q}}) \cdot \tanh(\mathbf{v}^{rightT} \overrightarrow{\mathbf{h}}_t^{\mathbf{Q}}) - \\ & \quad \tanh(\mathbf{v}^{leftT} \overleftarrow{\mathbf{h}}_{t'}^{\mathbf{Q}'}) \cdot \tanh(\mathbf{v}^{rightT} \overrightarrow{\mathbf{h}}_{t'}^{\mathbf{Q}'})\| \\ &= \|\tanh(\mathbf{v}^{leftT} (\overleftarrow{\mathbf{h}}_t^{\mathbf{Q}} - \overleftarrow{\mathbf{h}}_{t'}^{\mathbf{Q}'}) \cdot \tanh(\mathbf{v}^{rightT} \overleftarrow{\mathbf{h}}_t^{\mathbf{Q}}) \\ &+ \tanh(\mathbf{v}^{leftT} \overleftarrow{\mathbf{h}}_{t'}^{\mathbf{Q}'}) \cdot \tanh(\mathbf{v}^{rightT} (\overrightarrow{\mathbf{h}}_t^{\mathbf{Q}} - \overrightarrow{\mathbf{h}}_{t'}^{\mathbf{Q}'})\| \\ &< \|\tanh(\mathbf{v}^{leftT} (\overleftarrow{\mathbf{h}}_t^{\mathbf{Q}} - \overleftarrow{\mathbf{h}}_{t'}^{\mathbf{Q}'}) \cdot \tanh(\mathbf{v}^{rightT} \overrightarrow{\mathbf{h}}_t^{\mathbf{Q}})\| \end{aligned}$$

$$\begin{aligned} &+ \|\tanh(\mathbf{v}^{leftT} \overleftarrow{\mathbf{h}}_{t'}^{\mathbf{Q}'}) \cdot \tanh(\mathbf{v}^{rightT} (\overrightarrow{\mathbf{h}}_t^{\mathbf{Q}} - \overrightarrow{\mathbf{h}}_{t'}^{\mathbf{Q}'})\| \\ &< \delta (\|\mathbf{v}^{right}\| + \|\mathbf{v}^{left}\|) \end{aligned}$$

Thus,

$$\min_{t' \in t'(\mathbf{Q}), \mathbf{Q} \in D_i^{\mathbf{Q}}} \|r_t^{\mathbf{I}} - r_{t'}^{\mathbf{Q}}\| < T''' \delta$$

where  $T''' = \|\mathbf{v}^{right}\| + \|\mathbf{v}^{left}\|$  is established. Therefore this proposition is established.,

4) Proof of Proposition A.6: In the update process using  $\mathbf{Q} \in D^{tr}$ ,

$$\frac{\partial L^{\mathbf{Q}}}{\partial w_j^p} = \sum_{t=1}^n \frac{\partial L^{\mathbf{Q}}}{\partial c_t^{\mathbf{Q}}} \frac{\partial c_t^{\mathbf{Q}}}{\partial p_t^{\mathbf{Q}}} I(w_j, p_t^{\mathbf{Q}}) = \sum_{t=1}^n \frac{\partial L^{\mathbf{Q}}}{\partial c_t^{\mathbf{Q}}} s_t^{\mathbf{Q}} I(w_j, p_t^{\mathbf{Q}}) \quad (26)$$

is established. Here, when  $w_j = p_t^{\mathbf{Q}}$ , all the values of  $\{s_t^{\mathbf{Q}}\}$  satisfy Eq (18). Thus, this proposition is established.

5) Proof of Proposition A.7: Proof After the sufficient time of update iterations, for every  $j$ ,

$$\mathbf{u}^{3,\mathbf{Q}} := \tanh(\sum_{t=1}^n \mathbf{v}_t^{\mathbf{Q}})$$

$$\begin{aligned} E \left[ \frac{\partial L^{\mathbf{Q}}}{\partial w_{1,j}^O} \right] &= E \left[ \sum_{\mathbf{Q} \in D^{mini}} \Delta_{o,1}^{\mathbf{Q}} (\mathbf{u}_j^{3,\mathbf{Q}})^T \right] > 0 \\ E \left[ \frac{\partial L^{\mathbf{Q}}}{\partial w_{2,j}^O} \right] &= E \left[ \sum_{\mathbf{Q} \in D^{mini}} \Delta_{o,2}^{\mathbf{Q}} (\mathbf{u}_j^{3,\mathbf{Q}})^T \right] < 0 \end{aligned}$$

where  $w_{i,j}^O$  is the  $(i, j)$  element of  $\mathbf{W}^O$  and  $D^{mini}$  is the mini-batch dataset in the learning. Therefore, considering that each value of  $\mathbf{u}^{3,\mathbf{Q}}$  is negative and positive when  $d^{\mathbf{Q}} = 0$  and  $d^{\mathbf{Q}} = 1$ , respectively, is established because Proposition A.3 is established. Therefore, Proposition A.7 is established.

6) Proof of Proposition A.8: First,

$$\begin{aligned} \frac{\partial L^{\mathbf{Q}}}{\partial p_t^{\mathbf{Q}}} &= \frac{\partial L^{\mathbf{Q}}}{\partial c_t^{\mathbf{Q}}} \frac{\partial c_t^{\mathbf{Q}}}{\partial p_t^{\mathbf{Q}}} = \mathbf{M}_t^{\mathbf{Q}T} \Delta_o^{\mathbf{Q}} \alpha_t^{\mathbf{Q}} s_t^{\mathbf{Q}}, \\ \frac{\partial L^{\mathbf{Q}}}{\partial s_t^{\mathbf{Q}}} &= \frac{\partial L^{\mathbf{Q}}}{\partial c_t^{\mathbf{Q}}} \frac{\partial c_t^{\mathbf{Q}}}{\partial s_t^{\mathbf{Q}}} = \mathbf{M}_t^{\mathbf{Q}T} \Delta_o^{\mathbf{Q}} \alpha_t^{\mathbf{Q}} p_t^{\mathbf{Q}}, \end{aligned}$$

and

$$\frac{\partial L^{\mathbf{Q}}}{\partial w_{1,j}^O} = \Delta_{o,1}^{\mathbf{Q}} (\mathbf{u}_j^{3,\mathbf{Q}})^T, \quad \frac{\partial L^{\mathbf{Q}}}{\partial w_{2,j}^O} = \Delta_{o,2}^{\mathbf{Q}} (\mathbf{u}_j^{3,\mathbf{Q}})^T \quad (27)$$

where

$$\Delta_{o,1}^{\mathbf{Q}} = -\Delta_{o,2}^{\mathbf{Q}}$$

are established. Therefore,

$$-w_{1,j}^O = w_{2,j}^O (= \omega_j) \quad (28)$$

is established. Moreover,

$$\begin{aligned} \frac{\partial L^{\mathbf{Q}}}{\partial \mathbf{u}^{3,\mathbf{Q}}} &= \frac{\partial L^{\mathbf{Q}}}{\partial \mathbf{a}} \frac{\partial \mathbf{a}}{\partial w_j^o} = \Delta_o^{\mathbf{Q}} \mathbf{W}^o = \Delta_o^{\mathbf{Q}} [-\omega; \omega] \\ &= \begin{cases} 2|\Delta_{o,1}^{\mathbf{Q}}| \omega & (d^{\mathbf{Q}} = 0) \\ -2|\Delta_{o,1}^{\mathbf{Q}}| \omega & (d^{\mathbf{Q}} = 1) \end{cases} \end{aligned} \quad (29)$$

is established. Therefore, after the sufficient time of iterations,

$$E[\mathbf{u}^{3,\mathbf{Q}}] = \begin{cases} -k\boldsymbol{\omega} & (d^{\mathbf{Q}} = 0) \\ k\boldsymbol{\omega} & (d^{\mathbf{Q}} = 1) \end{cases}$$

where  $k > 0$  is expected to be established.

Therefore,

$$\begin{aligned} M_t^{\mathbf{Q}T} \Delta_o^{\mathbf{Q}} &= \mathbf{b}_t^{\mathbf{Q}T} \text{diag}(1 - (\tanh(\sum_{t=1}^n v_t^{\mathbf{Q}}))^2) \mathbf{W}^{oT} \Delta_o^{\mathbf{Q}} \\ &= \mathbf{b}_t^{\mathbf{Q}T} \text{diag}(1 - (\tanh(\sum_{t=1}^n v_t^{\mathbf{Q}}))^2) \mathbf{W}^{oT} \Delta_o^{\mathbf{Q}} \\ &= \begin{cases} 2|\Delta_{o,2}^{\mathbf{Q}}| \mathbf{b}_t^{\mathbf{Q}T} \text{diag}(\mathbf{1} - (\tanh(\sum_{t=1}^n v_t^{\mathbf{Q}}))^2) \boldsymbol{\omega} & (d^{\mathbf{Q}} = 0) \\ -2|\Delta_{o,2}^{\mathbf{Q}}| \mathbf{b}_t^{\mathbf{Q}T} \text{diag}(\mathbf{1} - (\tanh(\sum_{t=1}^n v_t^{\mathbf{Q}}))^2) \boldsymbol{\omega} & (d^{\mathbf{Q}} = 1) \end{cases} \end{aligned}$$

Moreover, after the sufficient times of iterations,

$$\text{sign}(\omega_1) = \text{sign}(\omega_2) = \dots = \text{sign}(\omega_k) \quad (30)$$

is established because Eq (27) and

$$\mathbf{u}^{3,\mathbf{Q}} = \sum_{t=1}^n v_t^{\mathbf{Q}} = \sum_{t=1}^n g_t^{\mathbf{Q}} \mathbf{b}_t^{\mathbf{Q}}$$

where

$$\text{sign}(v_{t,1}^{\mathbf{Q}}) = \text{sign}(v_{t,2}^{\mathbf{Q}}) = \dots = \text{sign}(v_{t,k}^{\mathbf{Q}}).$$

are satisfied, and in sufficient times of cases,

$$\mathbf{u}^{3,\mathbf{Q}} \simeq g_{\hat{t}}^{\mathbf{Q}} \mathbf{b}_{\hat{t}}^{\mathbf{Q}} \quad (31)$$

where

$$\hat{t} = \text{argmax}_t g_t^{\mathbf{Q}}.$$

Eq (31) occurs because

$$E[p_t^{\mathbf{Q}} | w_t^{\mathbf{Q}} \in S^d] \gg E[p_t^{\mathbf{Q}} | w_t^{\mathbf{Q}} \notin S^d]$$

$$E[\alpha_t^{\mathbf{Q}} | \min_{w_j \in S^d} |w_t^{\mathbf{Q}} - \mathbf{w}_j^{em}| < \epsilon] \gg E[\alpha_t^{\mathbf{Q}} | \min_{w_j \in S^d} |w_t^{\mathbf{Q}} - \mathbf{w}_j^{em}| \geq \epsilon],$$

where  $\epsilon$  is sufficiently small, and  $|S^d|$  is sufficiently small.

Therefore,

$$\text{sign}(M_t^{\mathbf{Q}T} \Delta_o^{\mathbf{Q}}) = \begin{cases} -\chi & (d^{\mathbf{Q}} = 0) \\ \chi & (d^{\mathbf{Q}} = 1) \end{cases}.$$

Thus,

$$s_t^{\mathbf{Q}} \simeq \epsilon - \sum_{\mathbf{Q}' \in \Omega^{tr}} \sum_{t'=1}^{|\mathbf{Q}'|} M_{t'}^{\mathbf{Q}'T} \Delta_o^{\mathbf{Q}'} \alpha_{t'}^{\mathbf{Q}'} p_{t'}^{\mathbf{Q}'} I(|e_t^{\mathbf{Q}} - e_{t'}^{\mathbf{Q}}| < \epsilon, True).$$

$$\simeq - \sum_{\mathbf{Q}' \in \Omega^{tr}} \sum_{t'=1}^{|\mathbf{Q}'|} M_{t'}^{\mathbf{Q}'T} \Delta_o^{\mathbf{Q}'} \alpha_{t'}^{\mathbf{Q}'} p_{t'}^{\mathbf{Q}'} I(|e_t^{\mathbf{Q}} - e_{t'}^{\mathbf{Q}}| < \epsilon, True) I(w_{t'}^{\mathbf{Q}} \in S^d, True).$$

Here,

$$\text{sign}(M_{t'}^{\mathbf{Q}'T} \Delta_o^{\mathbf{Q}'} \alpha_{t'}^{\mathbf{Q}'} p_{t'}^{\mathbf{Q}'} ) = \chi R(w_{t'}^{\mathbf{Q}'})$$

Thus, if  $w_t^{\mathbf{Q}} \in S^d$ , then,

$$\text{sign}(s_t^{\mathbf{Q}}) = -\chi R(w_t^{\mathbf{Q}})$$

is established because each  $w_j \in S^d$  satisfies Condition A.1. Therefore, in such a situation,

$$\begin{aligned} \text{sign} \left( \frac{\partial L^{\mathbf{Q}}}{\partial p_t^{\mathbf{Q}}} \right) &= \text{sign}(M_t^{\mathbf{Q}T} \Delta_o^{\mathbf{Q}} \alpha_t^{\mathbf{Q}} s_t^{\mathbf{Q}}) \\ &\simeq \begin{cases} \chi^2 R(w_t^{\mathbf{Q}}) = R(w_t^{\mathbf{Q}}) & (d^{\mathbf{Q}} = 0) \\ -\chi^2 R(w_t^{\mathbf{Q}}) = -R(w_t^{\mathbf{Q}}) & (d^{\mathbf{Q}} = 1). \end{cases} \end{aligned}$$

Therefore, if  $|e_t^{\mathbf{Q}} - \mathbf{w}_j^{em}| < \epsilon$  where  $\epsilon > 0$  is sufficiently small, then, the following equation is established.

$$\frac{\partial L^{\mathbf{Q}'}}{\partial p_{t'}^{\mathbf{Q}'}} = M_{t'}^{\mathbf{Q}'T} \Delta_o^{\mathbf{Q}'} \alpha_{t'}^{\mathbf{Q}'} s_{t'}^{\mathbf{Q}'} \simeq M_{t'}^{\mathbf{Q}'T} \Delta_o^{\mathbf{Q}'} \alpha_{t'}^{\mathbf{Q}'} s_{t'}^{\mathbf{Q}'}(w_{t'}^{\mathbf{Q}'}, w_j)$$

Therefore,

$$\text{sign} \left( \frac{\partial L^{\mathbf{Q}'}}{\partial p_{t'}^{\mathbf{Q}'}} \right) = \begin{cases} R(w_{t'}^{\mathbf{Q}'}(w_{t'}^{\mathbf{Q}'}, w_j)) & (d^{\mathbf{Q}'} = 0) \\ -R(w_{t'}^{\mathbf{Q}'}(w_{t'}^{\mathbf{Q}'}, w_j)) & (d^{\mathbf{Q}'} = 1) \end{cases}.$$

because

$$s_{t'}^{\mathbf{Q}'} \simeq s_{t'}^{\mathbf{Q}'}(w_{t'}^{\mathbf{Q}'}, w_j)$$

due to  $|e_t^{\mathbf{Q}} - e_{t'}^{\mathbf{Q}'}| < \epsilon$  where  $\epsilon > 0$  is sufficiently small, is established.

Thus, Proposition A.8 is established.
